# Supplementary material
Source: Springer Nature journal article supplement (https://www.springermedizin.de/resource/supplementary/12884_2013_976_MOESM2_ESM.pdf/9459360)
Supplement: MOESM2 [file 9459360]

**Table 3: Factors associated with quality of antenatal care services in Nepal**

| <b>Study variables</b>                          | <b>Total number of women</b> | <b>Number of women who had good quality ANC (%)</b> | <b>Unadjusted Odds Ratio (95% CI)</b> | <b>P</b> | <b>Adjusted Odds Ratio (95% CI)</b> | <b>P</b> |
|-------------------------------------------------|------------------------------|-----------------------------------------------------|---------------------------------------|----------|-------------------------------------|----------|
| <b>Women's age at birth of child</b> (Mean, SD) | 24.7                         | 24.2 (4.86)                                         |                                       |          |                                     | 0.041    |
| With each ten years increase in women's age     | Linear                       |                                                     | 0.82 (0.67 to 1.00)                   | 0.045    | 1.46 (1.08 to 1.97)                 | 0.013    |
|                                                 | Quadratic                    |                                                     | 0.72 (0.58 to 0.90)                   | 0.004    |                                     |          |
| <b>Women's education</b>                        |                              |                                                     |                                       | <0.001   |                                     | 0.057    |
| No education                                    | 1372                         | 179 (13.1)                                          | 1 (Referent category)                 |          | 1 (Referent category)               |          |
| Primary education                               | 714                          | 138 (19.3)                                          | 1.60 (1.16 to 2.20)                   |          | 1.16 (0.81 to 1.68)                 |          |
| Secondary education                             | 1172                         | 415 (35.4)                                          | 3.65 (2.64 to 5.05)                   |          | 1.58 (1.09 to 2.28)                 |          |
| Tertiary education                              | 262                          | 121 (46.2)                                          | 5.72 (3.79 to 8.62)                   |          | 1.53 (0.97 to 2.41)                 |          |

|                                                                                                                                                                            |      |            |                       |        |                       |       |
|----------------------------------------------------------------------------------------------------------------------------------------------------------------------------|------|------------|-----------------------|--------|-----------------------|-------|
| <b>Wealth quintile to which the women's household belonged</b>                                                                                                             |      |            |                       | <0.001 |                       | 0.001 |
| Poorest                                                                                                                                                                    | 657  | 55 (8.3)   | 1 (Referent category) |        | 1 (Referent category) |       |
| Poorer                                                                                                                                                                     | 733  | 98 (13.3)  | 1.69 (1.11 to 2.57)   |        | 1.40 (0.90 to 2.19)   |       |
| Middle                                                                                                                                                                     | 792  | 169 (21.3) | 2.98 (1.95 to 4.56)   |        | 1.90 (1.18 to 3.06)   |       |
| Richer                                                                                                                                                                     | 701  | 256 (36.6) | 6.34 (4.12 to 9.73)   |        | 2.86 (1.74 to 4.71)   |       |
| Richest                                                                                                                                                                    | 637  | 276 (43.3) | 8.40 (5.44 to 12.98)  |        | 2.88 (1.70 to 4.89)   |       |
| <b>Whether women participated in at least one of the three decisions regarding their own health care, major household purchases and visit to their family or relatives</b> |      |            |                       | 0.043  | -                     | -     |
| No                                                                                                                                                                         | 2059 | 467 (22.7) | 1 (Referent category) |        |                       |       |
| Yes                                                                                                                                                                        | 1461 | 386 (26.4) | 1.22 (1.01 to 1.49)   |        |                       |       |
| <b>Whether women were exposed to any of the three general media (radio, television or newspaper/magazines) at least once a week</b>                                        |      |            |                       | 0.329  | -                     | -     |
| Not exposed                                                                                                                                                                | 1334 | 340 (14.6) | 1 (Referent category) |        |                       |       |
| Exposed                                                                                                                                                                    | 2186 | 514 (9.7)  | 0.90 (0.72 to 1.12)   |        |                       |       |
| <b>Parity (Mean, SD)</b>                                                                                                                                                   | 2.4  | 1.9 (2.00) |                       | <0.001 |                       | <.001 |
| With each unit increase in live birth                                                                                                                                      |      |            | 0.69 (0.63 to 0.75)   |        | 0.79 (0.70 to 0.88)   |       |
| <b>History of previous pregnancies</b>                                                                                                                                     |      |            |                       | 0.016  | -                     | -     |

|                                                  |      |            |                       |        |                       |       |
|--------------------------------------------------|------|------------|-----------------------|--------|-----------------------|-------|
| No complications in previous pregnancies         | 2978 | 750 (25.2) | 1 (Referent category) |        |                       |       |
| Complications in previous pregnancies            | 542  | 104 (19.2) | 0.71 (0.53 to 0.94)   |        |                       |       |
| <b>Use of modern family planning</b>             |      |            |                       | 0.044  |                       | 0.045 |
| No                                               | 2337 | 595 (25.5) | 1 (Referent category) |        | 1 (Referent category) |       |
| Yes                                              | 1183 | 258 (21.8) | 0.82 (0.67 to 0.99)   |        | 0.79 (0.62 to 0.99)   |       |
| <b>Ecological zones where women resided</b>      |      |            |                       | 0.001  | -                     | -     |
| Terai                                            | 1956 | 551 (28.2) | 1 (Referent category) |        |                       |       |
| Hill                                             | 1328 | 262 (19.7) | 0.63 (0.45 to 0.87)   |        |                       |       |
| Mountain                                         | 237  | 41 (17.3)  | 0.53 (0.36 to 0.78)   |        |                       |       |
| <b>Residence</b>                                 |      |            |                       | <0.001 |                       | 0.013 |
| Rural                                            | 3128 | 722 (23.1) | 1 (Referent category) |        |                       |       |
| Urban                                            | 392  | 132 (33.7) | 1.69 (1.29 to 2.20)   |        | 1.52 (1.09 to .2.12)  |       |
| <b>Place where women received antenatal care</b> |      |            |                       | <0.001 |                       | 0.005 |
| Government Hospital                              | 605  | 210 (34.7) | 1 (Referent category) |        | 1 (Referent category) |       |
| Home                                             | 43   | 1 (2.8)    | 0.05 (0.01 to 0.39)   |        | 0.25 ( 0.03 to 2.08)  |       |
| Government PHC Centre                            | 287  | 79 (27.6)  | 0.72 (0.46 to 1.11)   |        | 0.85 (0.52 to 1.37)   |       |

|                                                                 |      |            |                       |        |                       |        |
|-----------------------------------------------------------------|------|------------|-----------------------|--------|-----------------------|--------|
| Government Health Post                                          | 430  | 54 (12.6)  | 0.27 (0.18 to 0.41)   |        | 0.44 (0.28 to 0.68)   |        |
| Government Sub Health Post                                      | 877  | 88 (10.0)  | 0.21 (0.14 to 0.32)   |        | 0.67 (0.40 to 1.11)   |        |
| Government PHC Outreach                                         | 269  | 30 (11.1)  | 0.23 (0.11 to 0.48)   |        | 0.94 (0.50 to 1.77)   |        |
| Private Hospital/Clinic                                         | 860  | 322 (37.4) | 1.12 (0.84 to 1.51)   |        | 0.85 (0.62 to 1.17)   |        |
| NGO                                                             | 136  | 68 (49.8)  | 1.86 (1.15 to 3.01)   |        | 1.60 (1.02 to 2.52)   |        |
| Others                                                          | 13   | 2 (12.7)   | 0.27 (0.07 to 1.03)   |        | 0.55 (0.10 to 3.07)   |        |
| <b>Health worker who provided the women with antenatal care</b> |      |            |                       | <0.001 |                       | <0.001 |
| Doctor                                                          | 1115 | 462 (41.5) | 1 (Referent category) |        | 1 (Referent category) |        |
| Female Community Health Volunteer                               | 38   | 1 (1.5)    | 0.02 (0.00 to 0.10)   |        | 0.10 (0.01 to 0.62)   |        |
| Village Health Worker                                           | 56   | 1 (1.5)    | 0.02 (0.00 to 0.16)   |        | 0.04 (0.01 to 0.29)   |        |
| Maternal and Child Health Worker                                | 534  | 25 (4.7)   | 0.07 (0.03 to 0.16)   |        | 0.16 (0.07 to 0.41)   |        |
| Health Assistant / Auxilliary Health Worker                     | 475  | 35 (7.5)   | 0.11 (0.07 to 0.20)   |        | 0.25 (0.13 to 0.46)   |        |
| Nurse/Midwife                                                   | 1301 | 329 (25.3) | 0.48 (0.39 to 0.59)   |        | 0.74 (0.58 to 0.94)   |        |
